# Supplementary material
Source: PubMed Central journal article supplement (PMC5871925)
Supplement: NIHMS943863-supplement-Group_author.pdf [file NIHMS943863-supplement-Group_author.pdf]

The NHBS Study Group: Atlanta, GA: Jennifer Taussig, Robert Gern, Tamika Hoyte, Laura Salazar, Jianglan White, Pascale Wortley, Jeff Todd, Greg Bautista, and Kimi Sato; Baltimore, MD: Colin Flynn, Frangiscos Sifakis, and Danielle German; Boston, MA: Debbie Isenberg, Maura Driscoll, Elizabeth Hurwitz, Maura Mimos, Dawn Fukuda, Rose Doherty, and Chris Wittke; Chicago, IL: Nikhil Prachand, Nanette Benbow, and Antonio D. Jimenez; Dallas, TX: Sharon Melville, Praveen Pannala, Richard Yeager, Aaron Sayegh, Jim Dyer, Jonathon Poe, Shane Sheu, and Alicia Novoa; Denver, CO: Mark Thrun, Alia Al-Tayyib, and Ralph Wilmoth, Detroit, MI: Emily Higgins, Vivian Griffin, Eve Mokotoff, Karen MacMaster, and Kathryn Macomber; Houston, TX: Marcia Wolverton, Jan Risser, Salma Khuwaja, Hafeez Rehman, and Paige Padgett; Los Angeles, CA: Trista Bingham and Ekow Kwa SeyYingbo Ma; Miami, FL: Marlene LaLota, Lisa Metsch, David Forrest, Dano Beck, and Gabriel Cardenas; Nassau-Suffolk, NY: Chris Nemeth, Bridget J. Anderson, Carol-Ann Watson, Amber Sinclair, Lou Smith; New Orleans, LA: William T. Robinson, DeAnn Gruber, Narquis Barak, and Meagan C. Zarwell; New York, NY: Alan Neaigus, Samuel Jenness, Holly Hagan, Kathleen H. Reilly, Travis Wendel; Newark, NJ: Helene Cross, Barbara Bolden, Sally D'Errico, Afework Wogayehu, and Henry Godette; Philadelphia, PA: Kathleen A. Brady, Althea Kirkland, Andrea Sifferman, Mark Shpaner, and Jennifer Shinefeld; San Diego, CA: Vanessa Miguelino-Keasling and Al Velasco, Veronica Tovar-Moore San Francisco, CA: H. Fisher Raymond, Theresa Ick; San Juan, PR: Sandra Miranda De León, Yadira Rolón-Colón, and Melissa Marzan; Seattle, WA: Maria Courogen, Tom Jaenicke, Hanne Thiede, and Richard Burt; Washington, DC: Yujiang Jia, Jenevieve Opoku, Marie Sansone, Tiffany West, Manya Magnus, and Irene Kuo; CDC: Behavioral Surveillance Team.
